# Supplementary material for: Emerging La2O2CN2 matrix with controllable 3D morphology for photoluminescence applications
Source: Royal Society of Chemistry journal article supplement (doi:10.1039/c7ce01418j), 2017-01-01
Supplement: c7ce01418j1.pdf [file c7ce01418j1.pdf]

## Supporting Information

### **Emerging $\text{La}_2\text{O}_2\text{CN}_2$ matrix with controllable 3D morphology for photoluminescence applications**

Huayu Bai, Yan Song, Dan Li, Qianli Ma, Xiangting Dong\*, Wensheng Yu, Ying Yang, Hui Yu,

Jinxian Wang, Guixia Liu

*Key Laboratory of Applied Chemistry and Nanotechnology at Universities of Jilin Province,*

*Changchun University of Science and Technology, Changchun 130022. Fax: 0086-0431-*

*85383815, E-mail: dongxiangting888@163.com, Tel: 0086-0431-85582575*

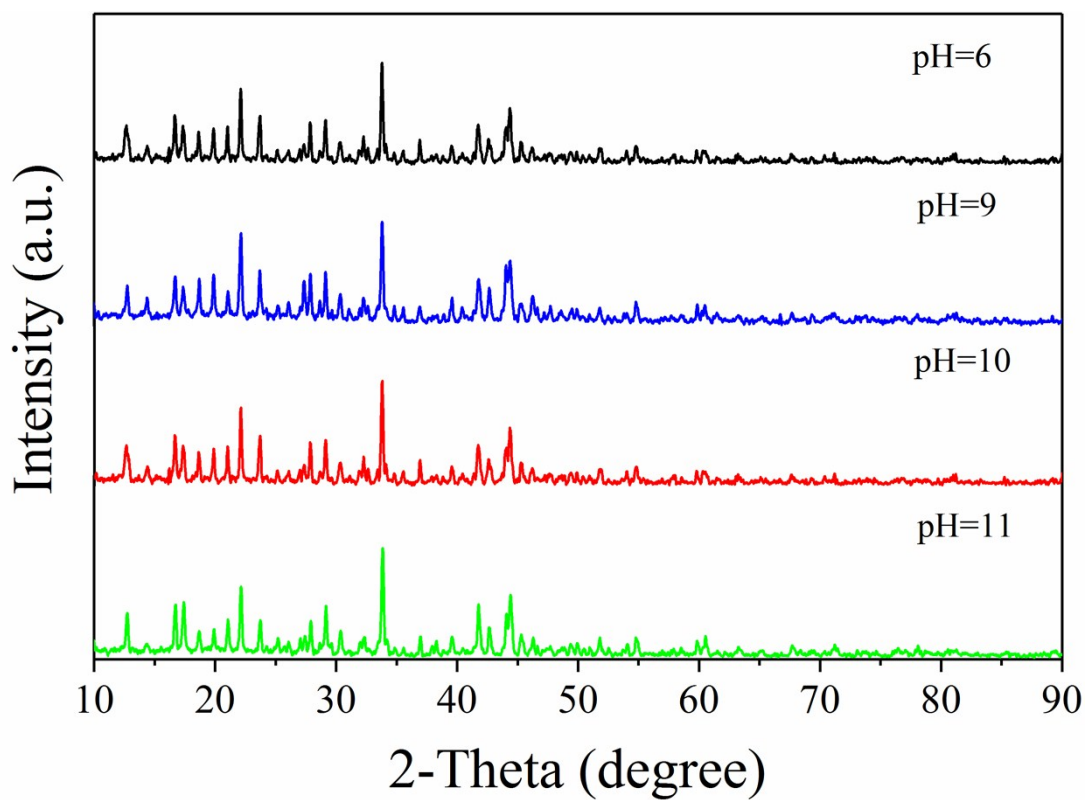

**Fig. S1** XRD patterns of hydrothermal precursors at different pH values.

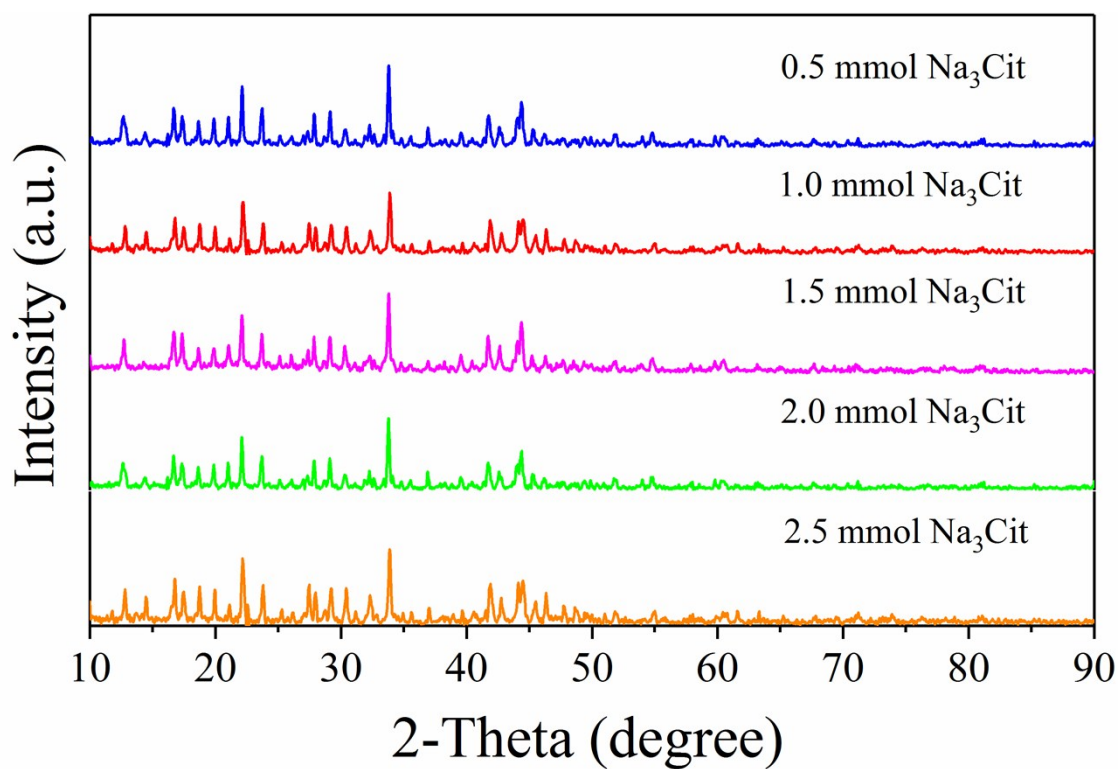

**Fig. S2** XRD patterns of hydrothermal precursors with different sodium citrate amounts.

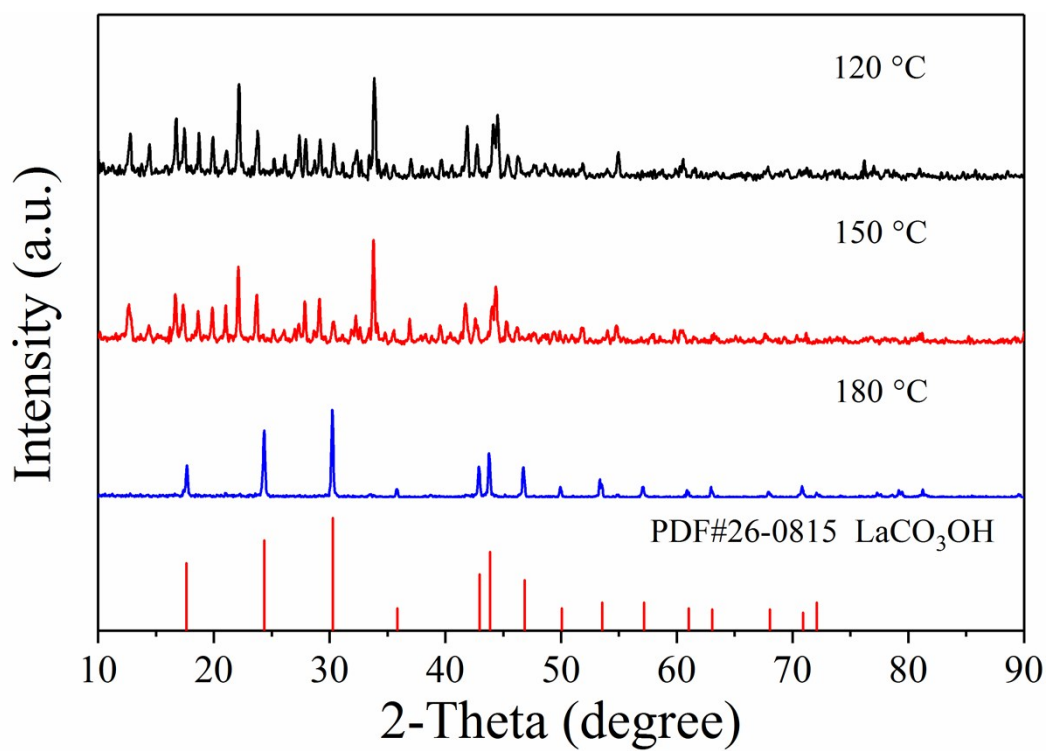

**Fig. S3** XRD patterns of hydrothermal precursors obtained at different reaction temperatures.
